# Supplementary material for: Whole-Genome Analysis of the SHORT-ROOT Developmental Pathway in \n<em>Arabidopsis</em>
Source: PLOS journal article supplement (doi:10.1371/journal.pbio.0040143), 2006-05-01
Supplement: S3 (10.1371/journal.pbio.0040143.s003) [file journal.pbio.0040143.s003]

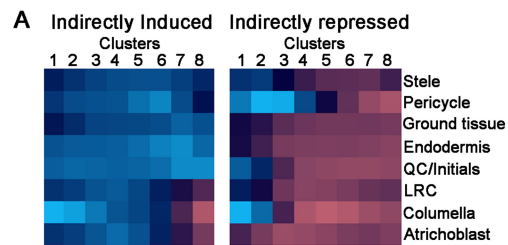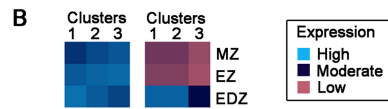

**C**

|                                                         | Total Genes  | 106 Indirectly Induced | 389 Indirectly Repressed |
|---------------------------------------------------------|--------------|------------------------|--------------------------|
| <b>QC/Initials</b>                                      | 582 (4.1%)   | 4 (4%)                 | 10 (3%)                  |
| <b>Endodermis</b>                                       | 403 (2.8%)   | 8 (8%)                 | 6 (2%)                   |
| <b>Pericycle</b>                                        | 1077 (7.6%)  | 5 (5%)                 | 70 (18%)                 |
| <b>Stele</b>                                            | 369 (2.6%)   | 2 (2%)                 | 33 (8%)                  |
| <b>Union of genes enriched in radial SHR cell-types</b> | 1883 (13.3%) | 14 (13%)               | 91 (23%)                 |
| <b>Meristematic</b>                                     | 1140 (8%)    | 1 (1%)                 | 18 (5%)                  |
| <b>Elongation</b>                                       | 172 (1.2%)   | 6 (6%)                 | 0                        |
| <b>Young Differentiation</b>                            | 1226 (8.5%)  | 7 (7%)                 | 94 (24%)                 |
