# Supplementary figures and images for: Whole-Genome Analysis of the SHORT-ROOT Developmental Pathway in \n<em>Arabidopsis</em>
Source: PLOS journal article supplement (doi:10.1371/journal.pbio.0040143), 2006-05-01

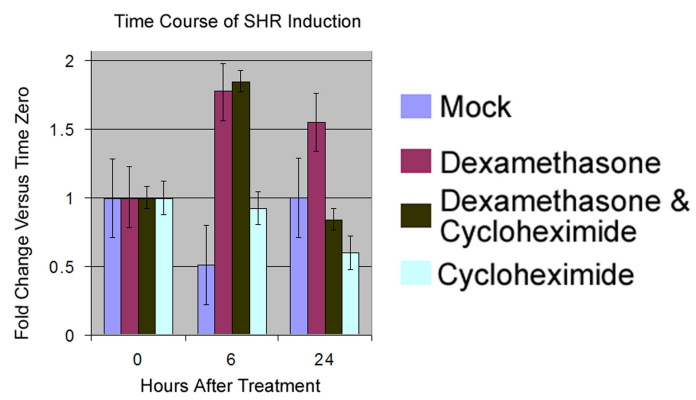

Supplement: S1 (10.1371/journal.pbio.0040143.s001) [file journal.pbio.0040143.s001]
